# Supplementary material for: Novel Antimicrobial Strategies to Prevent Biofilm Infections in Catheters after Radical Cystectomy: A Pilot Study
Source: MDPI journal article supplement (doi:10.3390/life12060802), 2022-05-27
Supplement: s1 [file s1]

## Supplementary Materials

**Table S1.** Clinical pathological characteristics of patients whose ureteral catheters bacterial communities have been analysed in the present study.

| Patient                             | U1             | U2             | U3             | U4             | U5             | U6             |
|-------------------------------------|----------------|----------------|----------------|----------------|----------------|----------------|
| <b>Sex</b>                          | M              | M              | M              | M              | M              | M              |
| <b>Age (years)</b>                  | 77             | 78             | 76             | 74             | 76             | 72             |
| <b>Tumor stage<sup>1</sup></b>      | pT3bN0M0       | pT3aN0M0       | pT2bN0M0       | pT3bN0M0       | pT3aN0M0       | pT2bN0M0       |
| <b>Smoking history</b>              | No             | Yes            | Yes            | No             | No             | Yes            |
| <b>Previous antibiotics history</b> | Cephalosporins | Cephalosporins | Cephalosporins | Cephalosporins | Cephalosporins | Cephalosporins |
| <b>Diabetes mellitus</b>            | Yes            | No             | No             | Yes            | No             | No             |
| <b>Insulin dependence</b>           | Yes            | No             | No             | No             | No             | No             |
| <b>Thyroid disease</b>              | No             | No             | No             | Yes            | No             | No             |
| <b>Cardiovascular disease</b>       | Yes            | Yes            | Yes            | No             | No             | No             |
| <b>Constipation</b>                 | Yes            | Yes            | No             | No             | No             | No             |
| <b>Recurrent UTI</b>                | Yes            | Yes            | No             | No             | No             | No             |
| <b>UTI-associated with fever</b>    | No             | Yes            | No             | No             | No             | No             |
| <b>Prostatic tumor at surgery</b>   | Yes            | No             | No             | Yes            | No             | No             |

<sup>1</sup>TNB stage system in accordance with European Association of Urology clinical guidelines.

**Table S2. Pairwise comparisons using Fisher's exact test based on FDR method. Statistical significance threshold  $\leq 0.05$ .** Raw data Fisher's test on all 6 extracts (three layers) with peptide alone or in combination with fosfomycin or ceftriaxone.

| Comparisons                            | PATIENT U1      |              |              | PATIENT U2   |              |              | PATIENT U3   |              |              | PATIENT U4 |              |              | PATIENT U5   |              |              | PATIENT U6   |              |              |
|----------------------------------------|-----------------|--------------|--------------|--------------|--------------|--------------|--------------|--------------|--------------|------------|--------------|--------------|--------------|--------------|--------------|--------------|--------------|--------------|
|                                        | A:B             | A:C          | B:C          | A:B          | A:C          | B:C          | A:B          | A:C          | B:C          | A:B        | A:C          | B:C          | A:B          | A:C          | B:C          | A:B          | A:C          | B:C          |
| Layers:<br>untreated.biofilm           | 1               | 0.18851<br>8 | 0.19392<br>1 | 1            | 1            | 1            | 0.20378<br>4 | 0.07152      | 0.77209      | 1          | 1            | 1            | 0.32513      | 0.43126      | 1            | 0.62384<br>2 | 0.15509<br>5 | 0.67794<br>3 |
| Layers:<br>r(P)ApoBl <sup>Ala</sup>    | 1               | 1            | 0.74767<br>2 | 1            | 0.70692<br>3 | 1            | 0.11531<br>9 | 0.10747<br>7 | 1            | 1          | 1            | 1            | 0.67563<br>4 | 0.40971<br>9 | 0.71316<br>7 | 0.62647<br>6 | 0.09103<br>6 | 0.40769<br>4 |
| Layers: fosfomycin                     | 0.34786<br>1396 | 0.43513<br>9 | 1            | 1            | 0.76277<br>9 | 0.80180<br>6 | 1            | 0.62957<br>6 | 0.7295       | 1          | 1            | 1            | 0.66417<br>9 | 0.09992<br>4 | 0.44891<br>1 | 0.62384<br>2 | 0.11531<br>5 | 0.44781<br>4 |
| Layers: ceftriaxone                    | 1               | 0.65910<br>7 | 0.74767<br>2 | 1            | 0.45867<br>5 | 0.46272<br>7 | 1            | 0.43684<br>1 | 0.23746<br>4 | 1          | 0.68058<br>4 | 1            | 1            | 0.43126<br>7 | 0.71316<br>7 | 1            | 0.67794<br>3 | 0.41604<br>8 |
| Layers:<br>r(P)ApoBl <sup>Ala</sup> .F | 1               | 0.75287<br>9 | 1            | 1            | 0.76719<br>8 | 1            | 1            | 1            | 1            | 1          | 1            | 0.53342<br>7 | 1            | 0.44891<br>1 | 0.71316<br>7 | 0.33876<br>8 | 0.04117<br>6 | 0.40769<br>4 |
| Layers:<br>r(P)ApoBl <sup>Ala</sup> .C | 1               | 0.72276<br>8 | 1            | 0.19877<br>9 | 0.01005<br>9 | 0.23395<br>7 | 0.68448<br>5 | 0.62957<br>6 | 0.19433<br>5 | 1          | 0.49112<br>3 | 0.85314<br>4 | 1            | 0.71316<br>7 | 0.45514<br>1 | 0.60303<br>7 | 1            | 0.40769<br>4 |

A:B Down vs Middle, A:C Down vs Upper, B:C Middle vs Upper layers

r(P)ApoBl<sup>Ala</sup>.F and r(P)ApoBl<sup>Ala</sup>.C means combination of antimicrobial peptide and antibiotic fosfomycin or ceftriaxone (1:20 ratio), respectively.

**Table S3. Pairwise comparisons using Fisher's exact test based on FDR method. Statistical significance threshold  $\leq 0.05$ .** Raw data Fisher's test on all 3 extract (three layers) with peptide alone or in combination with ciprofloxacin, gentamicin, tetracycline.

| Comparisons              | PATIENT U1  |            |            | PATIENT U3  |            |            | PATIENT U5  |            |            |
|--------------------------|-------------|------------|------------|-------------|------------|------------|-------------|------------|------------|
|                          | A:B         | A:C        | B:C        | A:B         | A:C        | B:C        | A:B         | A:C        | B:C        |
| Layers:untreated.biofilm | 0.713481281 | 1          | 0.41010959 | 0.699587897 | 0.41413788 | 0.720987   | 1           | 0.38524797 | 0.40604265 |
| Layers:r.P.ApoBL.Ala.    | 1           | 0.73455403 | 1          | 0.699587897 | 0.6995879  | 1          | 1           | 1          | 0.73573222 |
| Layers:ciprofloxacin     | 1           | 0.39505294 | 0.48774828 | 1           | 0.6995879  | 0.71833928 | 1           | 1          | 0.73573222 |
| Layers:gentamicin.       | 1           | 0.72586413 | 0.75993775 | 1           | 0.19289257 | 0.22633812 | 1           | 0.72821295 | 0.22081779 |
| Layers:tetracycline.     | 0.679343627 | 0.43322187 | 1          | 1           | 0.7023648  | 0.43707902 | 0.349281474 | 0.06150715 | 0.43367195 |
| Layers:r.P.ApoBL.Ala.C   | 1           | 1          | 1          | 1           | 0.41413788 | 0.41413788 | 1           | 0.72598718 | 0.7388349  |
| Layers:r.P.ApoBL.Ala.G   | 1           | 1          | 1          | 0.463509659 | 1          | 0.1896386  | 1           | 0.17100825 | 0.06119944 |
| Layers:r.P.ApoBL.Ala.T   | 0.725864126 | 0.40417759 | 0.75035288 | 1           | 0.6995879  | 0.71476204 | 0.60889869  | 1          | 0.73573222 |

A:B Down vs Middle, A:C Down vs Upper, B:C Middle vs Upper layers

r(P)ApoBL<sup>Ala</sup>.C and r(P)ApoBL<sup>Ala</sup>.G and r(P)ApoBL<sup>Ala</sup>.T means combination of antimicrobial peptide and antibiotic ciprofloxacin or gentamicin or tetracyclin (1:20 ratio), respectively

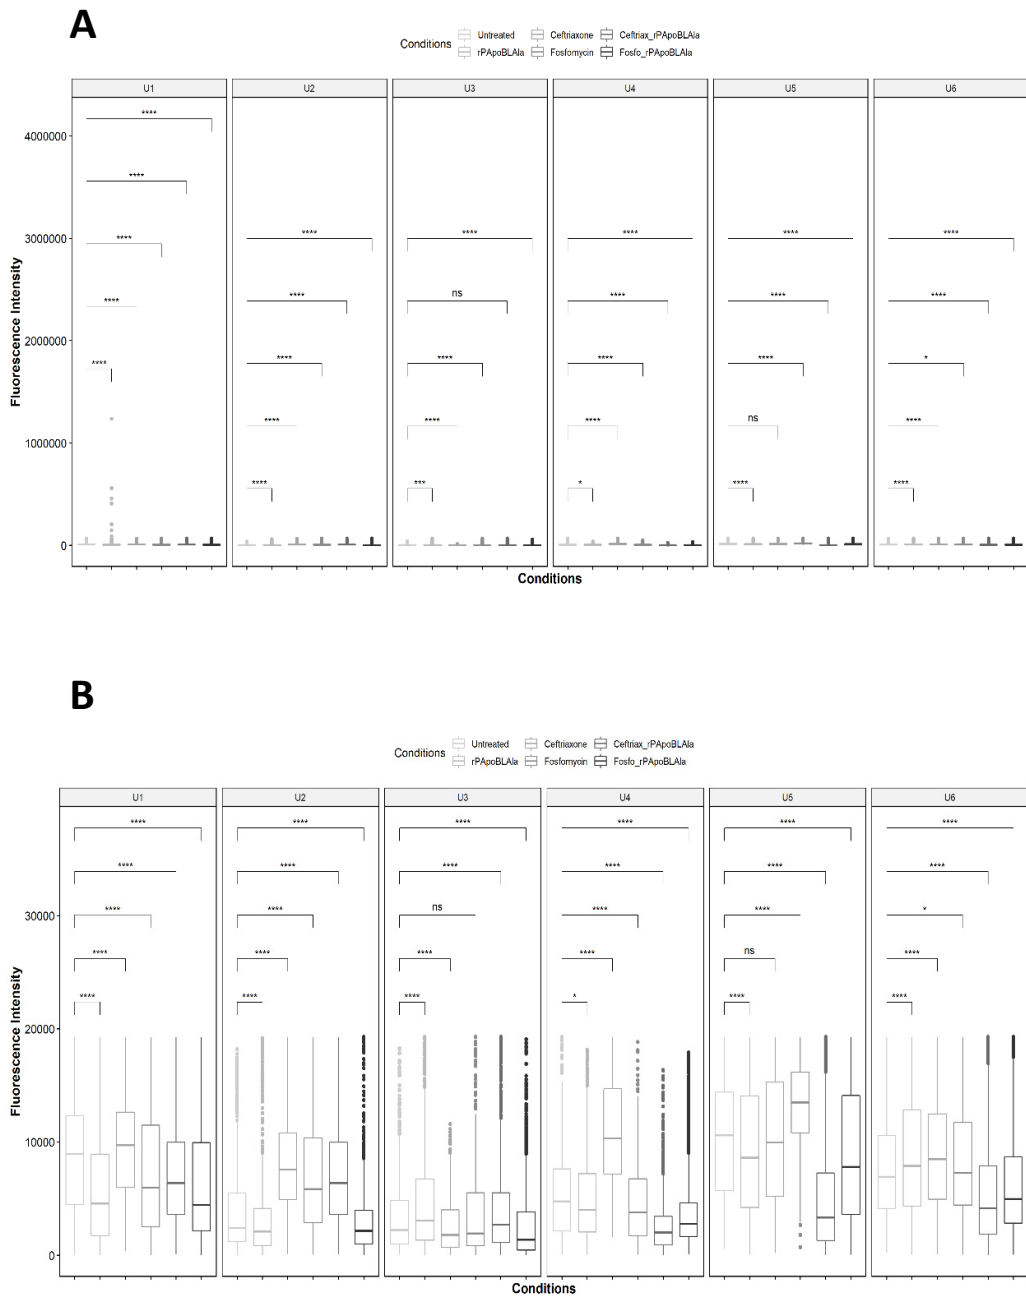

**Figure S1: CLSM data before (raw) and after outlier removal for U1, U2, U3, U4, U5, U6 extracts, respectively.** A) Raw data refer to the following experimental conditions from the left to the right side: untreated, r(P)ApoBL<sup>Ala</sup>, ceftriaxone, fosfomycin, ceftriaxone plus r(P)ApoBL<sup>Ala</sup>, fosfomycin plus r(P)ApoBL<sup>Ala</sup>. B) Pairwise comparisons using the “Untreated” biofilm as reference group, Wilcoxon test. Statistically significant difference levels \* p<0.05, \*\* p<0.01, \*\*\*p<0.001, \*\*\*\*p<0.0001, n.s. not significant.

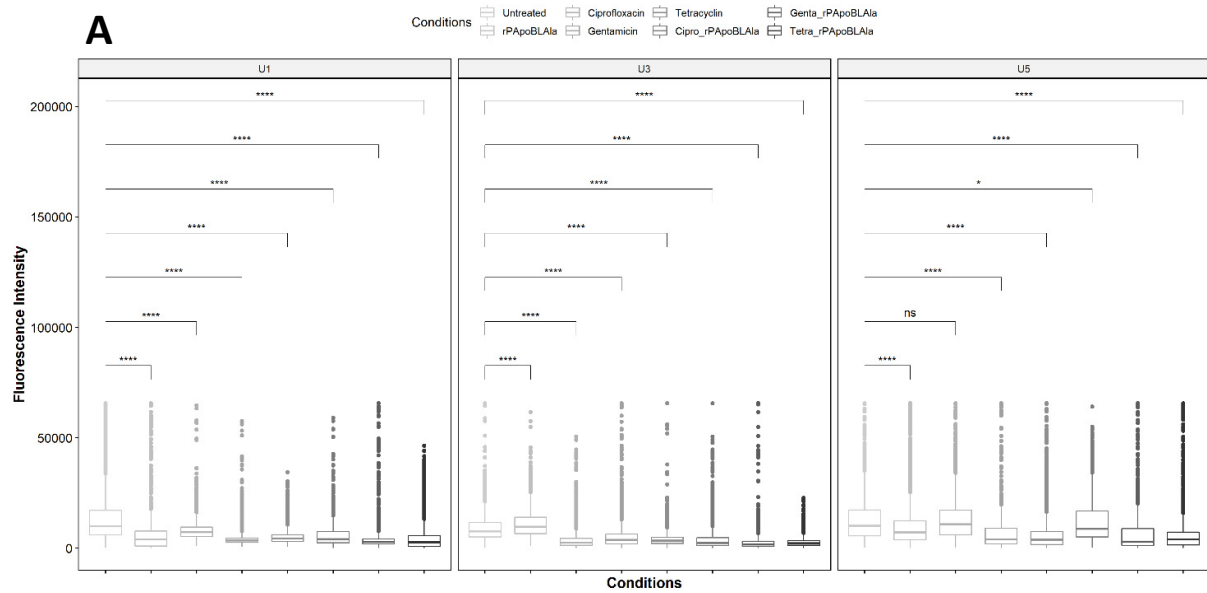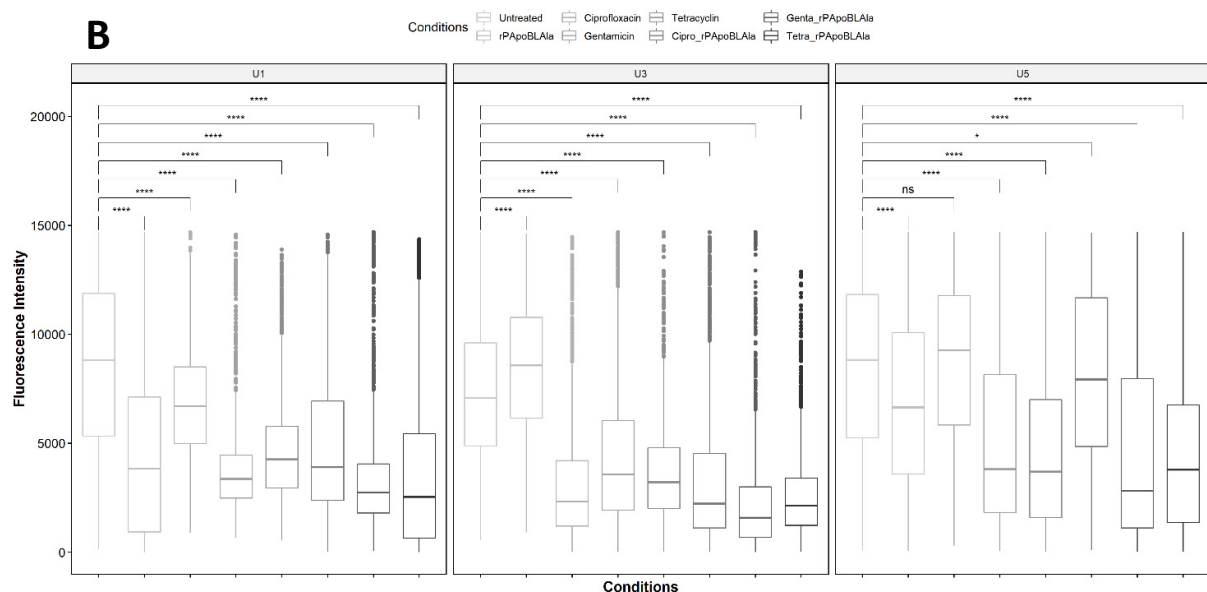

**Figure S2: CLSM data before (raw) and after outlier removal for U1, U3, U5 extracts, respectively. A)** Raw data for each biofilm experimental condition of growth from left to the right side are as follow: untreated, r(P)ApoBLA1a, ciprofloxacin, gentamycin, tetracycline, ciprofloxacin\_r(P)ApoBLA1a, gentamycin\_r(P)ApoBLA1a , tetracycline\_r(P)ApoBLA1a. **B)** Pairwise comparisons using the “untreated” biofilm as reference group, Wilcoxon test. Statistically significant difference levels \* p<0.05, \*\* p<0.01, \*\*\*p<0.001, \*\*\*\*p<0.0001, n.s. not significant.

**Table S4.** Biofilm thickness data and means pairwise comparison of U1, U4 and U5 catheter extracts upon incubation with r(P)ApoBLAla, ceftriaxone and fosfomycin (Anova and Tukey HSD post hoc test).

| Incubation variable                  | Ceftriaxone | Fosfomycin | r(P)ApoBL Ala | Ceftriaxone:r(P)ApoBL <sup>Ala</sup> | Fosfomycin:r(P)ApoBL <sup>Ala</sup> |
|--------------------------------------|-------------|------------|---------------|--------------------------------------|-------------------------------------|
| Untreated                            | ns          | ns         | ns            | 0.01638                              | ns                                  |
| Ceftriaxone                          |             | ns         | ns            | ns                                   | ns                                  |
| Fosfomycin                           | ns          |            | ns            | ns                                   | ns                                  |
| r(P)ApoBL Ala                        | 0.033484    | ns         |               | 0.005676                             | ns                                  |
| Ceftriaxone:r(P)ApoBL <sup>Ala</sup> | ns          | ns         | ns            |                                      | ns                                  |
| Fosfomycin:r(P)ApoBL <sup>Ala</sup>  | ns          | ns         | ns            | ns                                   |                                     |

ns: not significant (p adjusted <0.05).

**Table S5.** Biofilm thickness data and means pairwise comparison of U1, U3 and U5 catheter extracts upon incubation with r(P)ApoBLAla, gentamicin, ciprofloxacin and tetracycline (Anova and Tukey HSD post hoc test).

| Incubation variable                    | Ciprofloxacin | Gentamicin | Tetracycline | r(P)ApoBL Ala | Ciprofloxacin:r(P)ApoBL <sup>Ala</sup> | Gentamicin:r(P)ApoBL <sup>Ala</sup> | Tetracycline:r(P)ApoBL <sup>Ala</sup> |
|----------------------------------------|---------------|------------|--------------|---------------|----------------------------------------|-------------------------------------|---------------------------------------|
| Untreated                              | ns            | 1.8038E-05 | 2.2433E-02   | 2.2433E-02    | 8.9938E-04                             | 7.4429E-06                          | 7.4429E-06                            |
| Ciprofloxacin                          |               | 7.6266E-03 | ns           | ns            | ns                                     | 2.5949E-03                          | 2.5949E-03                            |
| Gentamicin                             | 7.6266E-03    |            | 2.2433E-02   | 2.2433E-02    | ns                                     | ns                                  | ns                                    |
| Tetracycline                           | ns            | 2.2433E-02 |              | ns            | ns                                     | ns                                  | 7.6266E-03                            |
| r(P)ApoBL Ala                          | ns            | 2.2433E-02 | ns           |               | ns                                     | 7.6266E-03                          | 7.6266E-03                            |
| Ciprofloxacin:r(P)ApoBL <sup>Ala</sup> | ns            | ns         | ns           | ns            |                                        | ns                                  | ns                                    |
| Gentamicin:r(P)ApoBL <sup>Ala</sup>    | 2.5949E-03    | ns         | ns           | 7.6266E-03    | ns                                     |                                     | ns                                    |
| Tetracycline:r(P)ApoBL <sup>Ala</sup>  | 2.5949E-03    | ns         | 7.6266E-03   | 7.6266E-03    | ns                                     | ns                                  |                                       |

ns: not significant (p adjusted <0.05).
